# Supplementary material for: Stabilizing the structure of LiMn0.5Fe0.5PO4via the formation of concentration-gradient hollow spheres with Fe-rich surfaces
Source: Royal Society of Chemistry journal article supplement (doi:10.1039/c8nr10224d), 2019-01-01
Supplement: c8nr10224d1.pdf [file c8nr10224d1.pdf]

## Supplementary Information

### Stabilizing the Structure of $\text{LiMn}_{0.5}\text{Fe}_{0.5}\text{PO}_4$ via Formation of Concentration-gradient Hollow Spheres with Fe-rich Surfaces

*Tingting Ruan,<sup>a</sup> Bo Wang,<sup>\*a, b</sup> Fei Wang,<sup>a</sup> Rensheng Song,<sup>a</sup>  
Fan Jin,<sup>a</sup> Yu Zhou,<sup>b</sup> Dianlong Wang,<sup>\*a</sup> Shixue Dou<sup>c</sup>*

<sup>a</sup> *MIT Key Laboratory of Critical Materials Technology for New Energy Conversion and Storage, School of Chemistry and Chemical Engineering, Harbin Institute of Technology, 150001 Harbin, China.*

<sup>b</sup> *School of Materials Science and Engineering, Harbin Institute of Technology, 150001 Harbin, China.*

<sup>c</sup> *Institute for Superconducting & Electronic Materials, Australian Institute of Innovative Materials, University of Wollongong, Wollongong, NSW 2500, Australia.*

*\* Corresponding author. Fax: +86 45186413721; Tel: +86 45186413751.*

*E-mail address:*

[wangdianlonghit@163.com](mailto:wangdianlonghit@163.com) (*D. L. Wang*)

[wangbo19880804@163.com](mailto:wangbo19880804@163.com) (*B. Wang*)

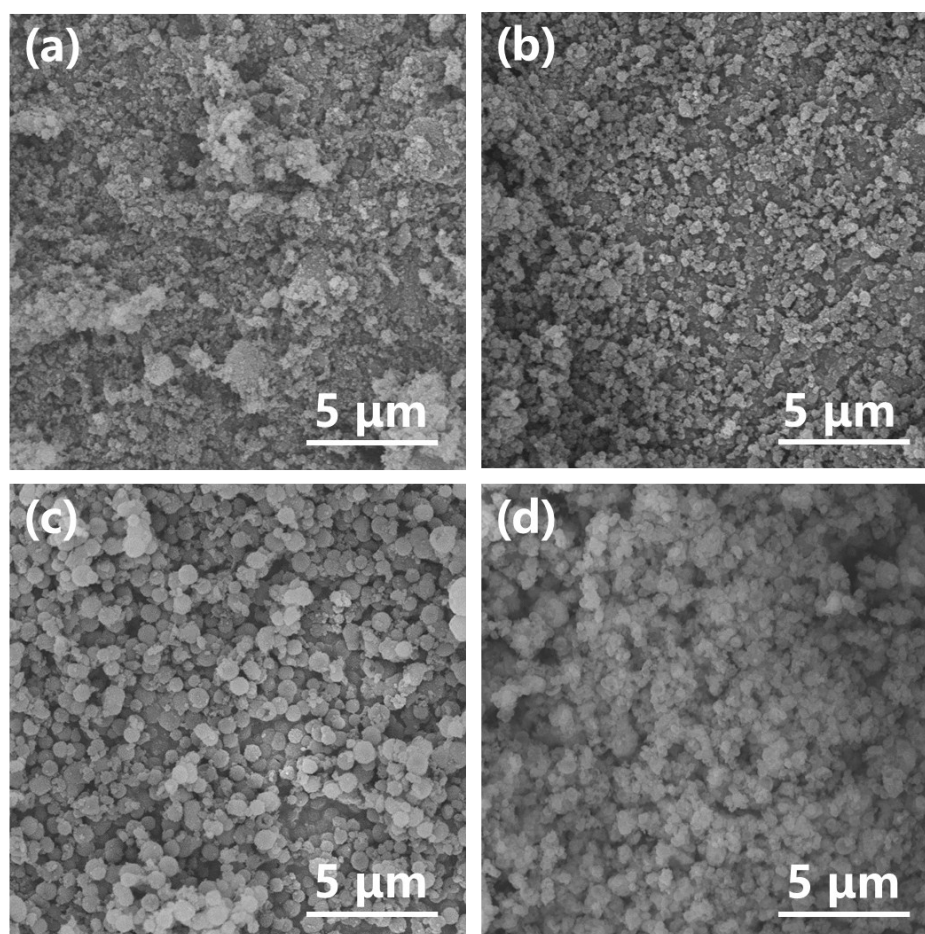

**Figure S1†** SEM images of the  $\text{Li}_3\text{PO}_4$  particles obtained with different volume ratios of  $\text{H}_2\text{O}:\text{PEG600}$ : a) 1:2, b) 3:2, c) 3:1, d) 5:0.

As can be seen from the scanning electron microscope (SEM) images, the particle size of the  $\text{Li}_3\text{PO}_4$  became larger and a spherical morphology was formed as the  $\text{H}_2\text{O}:\text{PEG600}$  solvent ratio was raised from 1:2 to 3:1, which could be attributed to the different velocities influencing the mass transport for the synthesis reaction. As the volume ratio of  $\text{H}_2\text{O}$  to PEG600 grew higher, the viscosity of the solution decreased, which would expedite the mass transfer process for the nucleation and growth of  $\text{Li}_3\text{PO}_4$  spheres. The resulting  $\text{Li}_3\text{PO}_4$  nanoparticles would create rough surface, however, and stick together in the absence of PEG600, as it manifested a strong capping effect on  $\text{Li}_3\text{PO}_4$  surface. The adsorption of PEG600 could reduce the surface energy of  $\text{Li}_3\text{PO}_4$ , which consequently overcame the tendency of particles towards fusion with each other.<sup>1</sup>

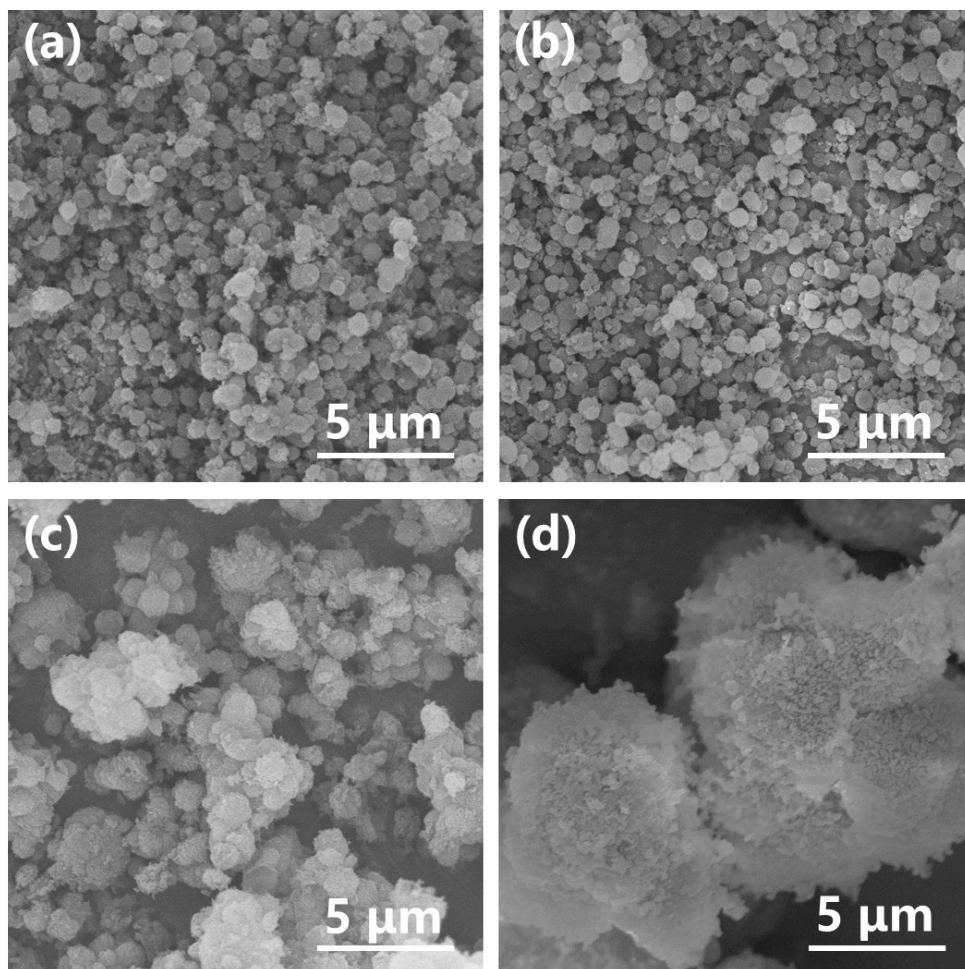

**Figure S2†** SEM images of the Li<sub>3</sub>PO<sub>4</sub> particles obtained at different pH values: a) pH = 10, b) pH = 11, c) pH = 13, d) pH = 14.

As shown in **Fig. S2**, as the pH value of the original solution increased, the hollow spherical structure of Li<sub>3</sub>PO<sub>4</sub> vanished and the particles were agglomerated into large grains, due to the dominance of PO<sub>4</sub><sup>3-</sup> at higher pH values without the pre-sacrificial precipitation of Li<sub>2</sub>HPO<sub>4</sub>, turning the hollow structured spheres into large solid ones.

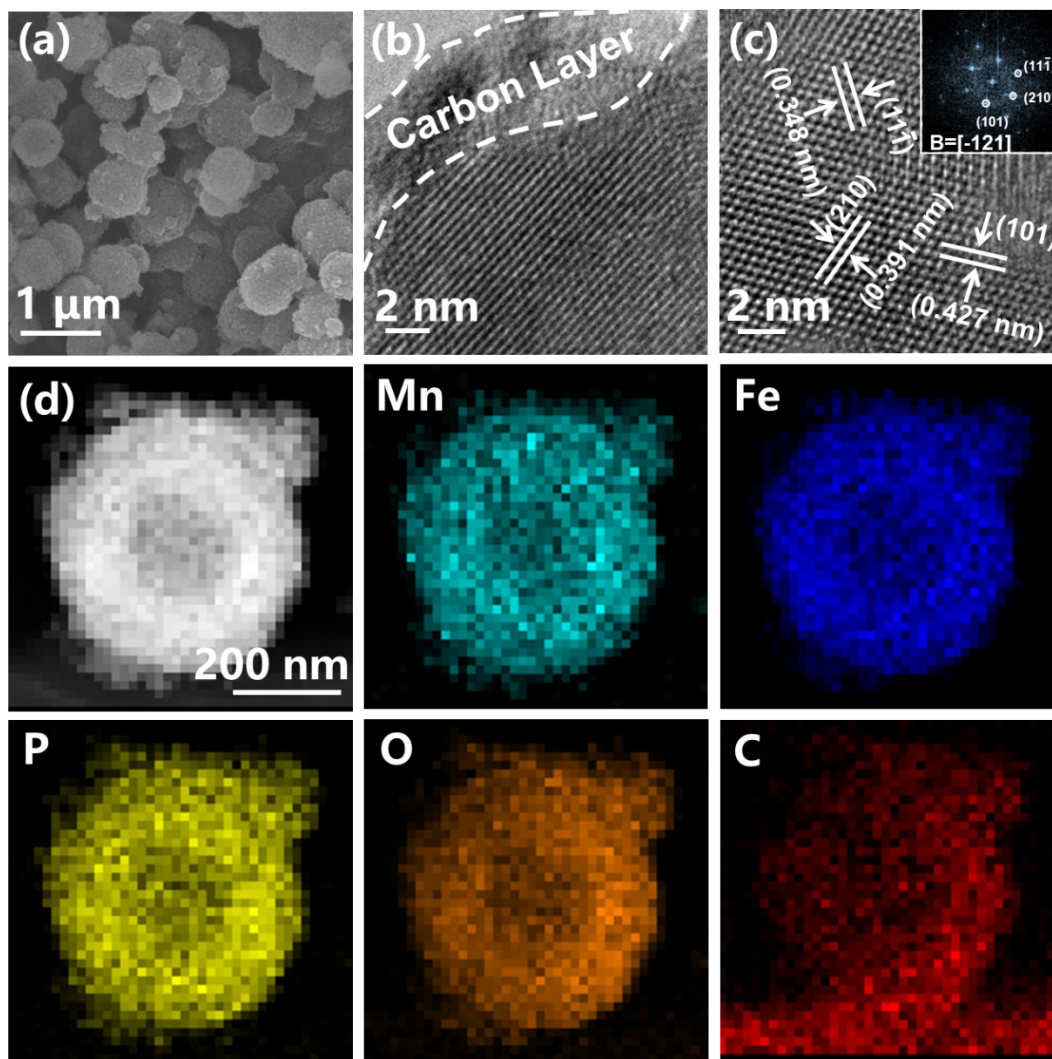

**Figure S3†** a) SEM image of C-LMFP/C. b, c) HRTEM images of C-LMFP/C with FFT pattern in the inset of c). d) HAADF-STEM image and elemental mapping results from a cross-section of a C-LMFP/C sphere.

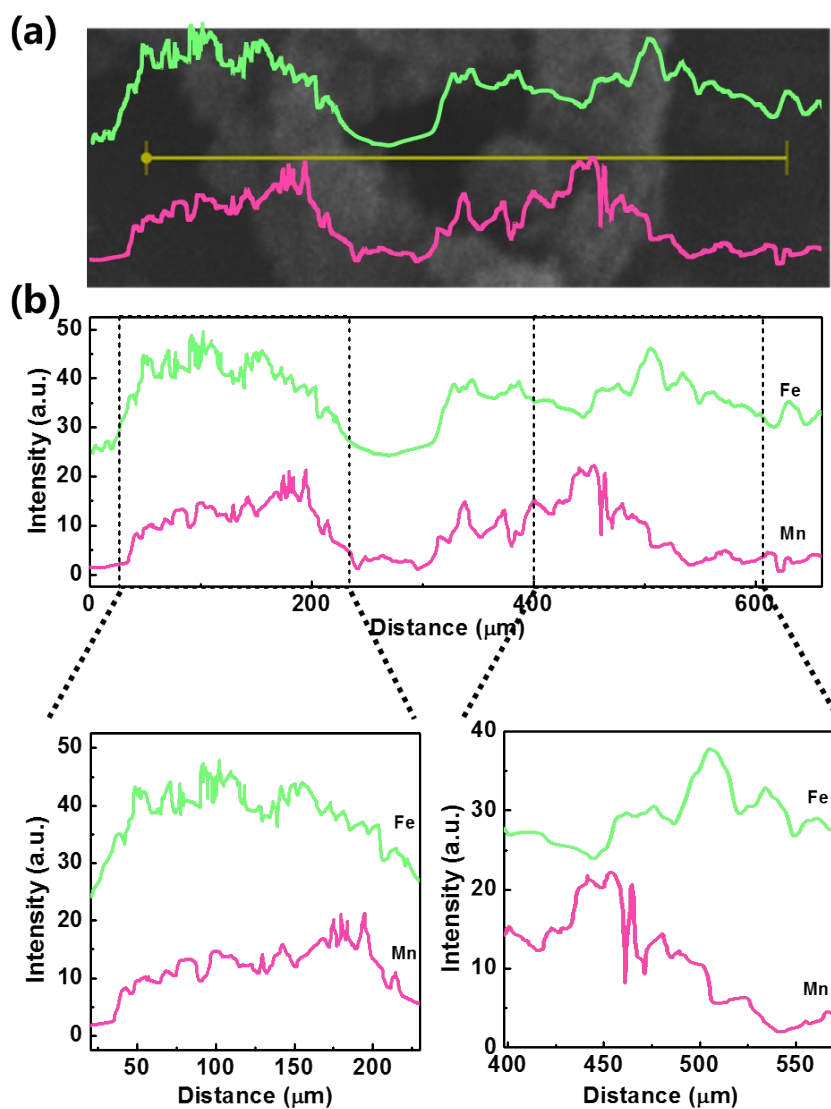

**Figure S4†** a) SEM image of a broken HCG-LMFP/C sphere. b) Line scan profiles of Fe and Mn across a broken HCG-LMFP/C sphere.

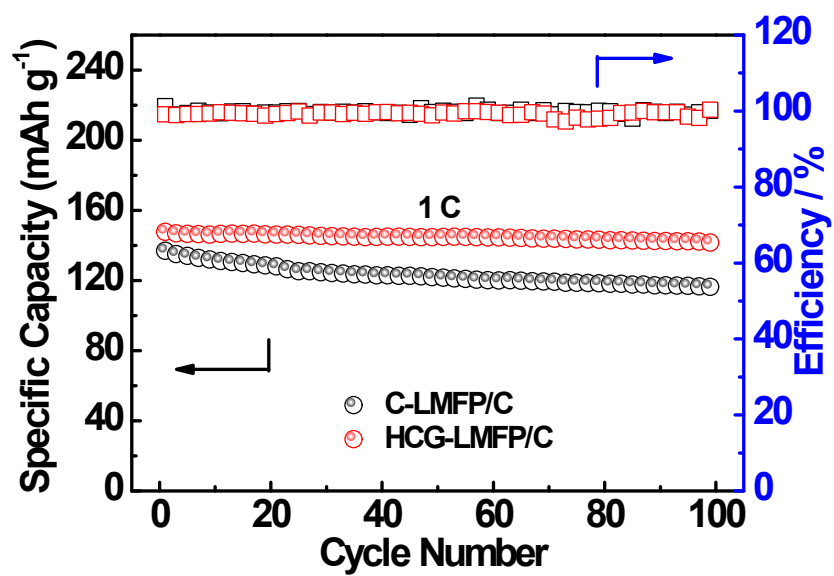

Figure S5† Cycling performances of C-LMFP/C and HCG-LMFP/C at the 1C rate.

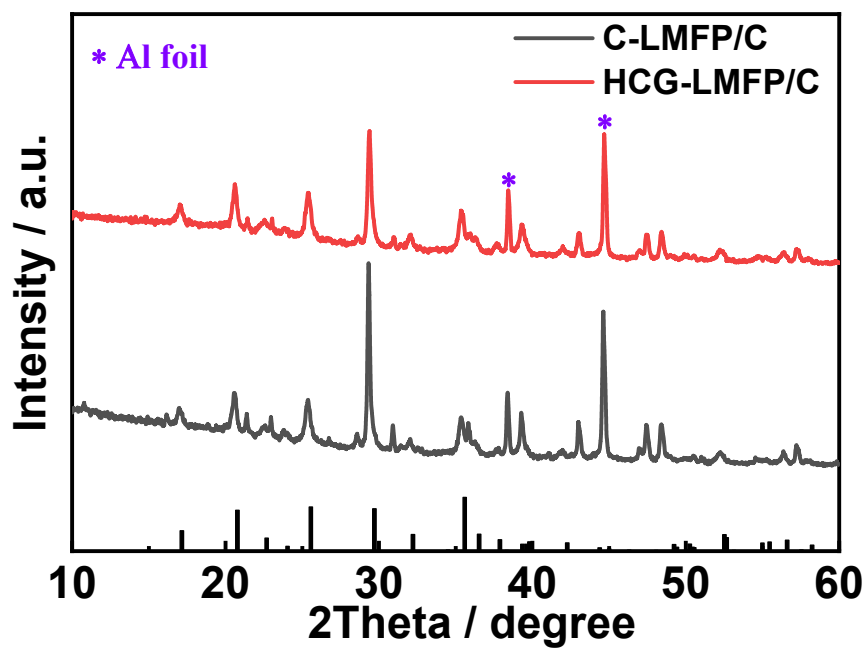

Figure S6† XRD patterns of C-LMFP/C and HCG-LMFP/C after cycling.

**Table S1†** Lattice constants and unit cell volume from the Rietveld refinements of C-LMFP and HCG-LMFP samples.  $R_p$ : profile R-factor;  $R_{wp}$ : weighted profile R-factor;  $\chi^2$ : goodness-of-fit parameter.

| Samples    | $a/\text{\AA}$ | $b/\text{\AA}$ | $c/\text{\AA}$ | $V/\text{\AA}^3$ | $R_{wp}/\%$ | $R_p/\%$ | $\chi^2$ |
|------------|----------------|----------------|----------------|------------------|-------------|----------|----------|
| C-LMFP/C   | 10.3285        | 6.0140         | 4.6945         | 291.60           | 3.01        | 2.47     | 1.52     |
| HCG-LMFP/C | 10.3216        | 6.0109         | 4.6926         | 291.14           | 2.75        | 2.18     | 1.46     |



**Table S2†** Comparison of the properties in the present work with other LiMnPO<sub>4</sub>-LiFePO<sub>4</sub> related cathodes reported in the last three years.

| Composites                                                                                                                                                                                                              | Particle size                                                 | Electrochemical behavior                                                                                                   | References |
|-------------------------------------------------------------------------------------------------------------------------------------------------------------------------------------------------------------------------|---------------------------------------------------------------|----------------------------------------------------------------------------------------------------------------------------|------------|
| LiFePO <sub>4</sub> nanoplatelets wrapped in a nitrogen-doped grapheme aerogel                                                                                                                                          | ~200 nm in length, ~40 nm in thickness                        | Initial discharge capacity ~124 mAh g <sup>-1</sup> , with a capacity retention of 89% after 1000 cycles at 10C rate       | 2          |
| LiMn <sub>0.5</sub> Fe <sub>0.5</sub> PO <sub>4</sub> nanoparticles                                                                                                                                                     | ~50 nm                                                        | Initial discharge capacity ~109 mAh g <sup>-1</sup> , with a capacity retention of 90% after 100 cycles at 1C rate         | 3          |
| Mesoporous LiMnPO <sub>4</sub> nanoplates                                                                                                                                                                               | ~200 nm in length, 5-20 nm in thickness                       | Initial discharge capacity ~156 mAh g <sup>-1</sup> , with a capacity retention of 83% after 100 cycles at 1C rate         | 4          |
| LiMn <sub>0.75</sub> Fe <sub>0.25</sub> PO <sub>4</sub> nanoplates with fluorine-doped carbon coating                                                                                                                   | ~150 nm                                                       | discharge capacity ~120 mAh g <sup>-1</sup> at the 500 <sup>th</sup> cycle at 10C rate, with a capacity retention of 80%   | 5          |
| LiMn <sub>0.6</sub> Fe <sub>0.4</sub> PO <sub>4</sub>                                                                                                                                                                   | Unmentioned                                                   | discharge capacity ~90 mAh g <sup>-1</sup> at the 1000 <sup>th</sup> cycle at 10C rate                                     | 6          |
| LiFePO <sub>4</sub> nanosheets                                                                                                                                                                                          | ~5 μm in lateral size, 15-20 nm in thickness                  | discharge capacity ~120 mAh g <sup>-1</sup> at the 500 <sup>th</sup> cycle at 5C rate, with a capacity retention of 93%    | 7          |
| LiFePO <sub>4</sub> nanoplatelets                                                                                                                                                                                       | 80-100 nm in length, 40-60 nm in width, 10-20 nm in thickness | discharge capacity ~105 mAh g <sup>-1</sup> at the 1000 <sup>th</sup> cycle at 10C rate, with a capacity retention of 87%  | 8          |
| LiMn <sub>0.9</sub> Fe <sub>0.1</sub> PO <sub>4</sub> -polyacene                                                                                                                                                        | unmentioned                                                   | discharge capacity ~91 mAh g <sup>-1</sup> at the 100 <sup>th</sup> cycle at 10C rate, with a capacity retention of 89.7%  | 9          |
| LiMn <sub>0.8</sub> Fe <sub>0.2</sub> PO <sub>4</sub> microspheres                                                                                                                                                      | ~1 μm in diameter                                             | discharge capacity ~105 mAh g <sup>-1</sup> at the 1000 <sup>th</sup> cycle at 5C rate, with a capacity retention of 93.9% | 10         |
| LiMn <sub>0.65</sub> Fe <sub>0.35</sub> PO <sub>4</sub> at core covered by LiMn <sub>0.38</sub> Fe <sub>0.62</sub> PO <sub>4</sub> with an average composition of LiMn <sub>0.5</sub> Fe <sub>0.5</sub> PO <sub>4</sub> | ~600 nm                                                       | Initial discharge capacity ~117 mAh g <sup>-1</sup> , with a capacity retention of 96% after 1000 cycles at 1C rate        | This work  |

**Table S3†** Results for the charge process in HCG-LMFP/C.

| Current densities                                    | 0.1C   | 0.2C   | 1C     | 2C     | 5C     | 10C    | 20C   | 60C   |
|------------------------------------------------------|--------|--------|--------|--------|--------|--------|-------|-------|
| galvanostatic charge capacity (mAh g <sup>-1</sup> ) | 168.10 | 156.40 | 147.42 | 137.04 | 128.09 | 110.12 | 93.5  | 60.0  |
| Total capacity (mAh g <sup>-1</sup> )                | 168.12 | 156.43 | 147.59 | 138.0  | 131    | 117.2  | 103   | 72.76 |
| galvanostatic charge capacity fraction (%)           | 99.98  | 99.97  | 99.88  | 99.31  | 97.78  | 93.96  | 90.29 | 82.47 |

**Table S4†** Results for the charge process in C-LMFP/C.

| Current densities                                    | 0.1C   | 0.2C   | 1C     | 2C     | 5C     | 10C   | 20C   | 60C   |
|------------------------------------------------------|--------|--------|--------|--------|--------|-------|-------|-------|
| galvanostatic charge capacity (mAh g <sup>-1</sup> ) | 169.32 | 156.17 | 146.26 | 126.54 | 101.64 | 75.74 | 53.85 | 21.60 |
| Total capacity (mAh g <sup>-1</sup> )                | 169.34 | 156.21 | 146.51 | 127.58 | 104    | 85.6  | 66.7  | 35.13 |
| galvanostatic charge capacity fraction (%)           | 99.98  | 99.97  | 99.83  | 99.19  | 97.72  | 88.49 | 80.74 | 61.48 |

**Table S5†** The structure parameters of the C-LMFP/C and HCG-LMFP/C cathodes after cycling.

| Samples              |                               | C-LMFP/C                      | HCG-LMFP/C                    |
|----------------------|-------------------------------|-------------------------------|-------------------------------|
| Space group          |                               | <i>Pnma</i><br>(orthorhombic) | <i>Pnma</i><br>(orthorhombic) |
| Unit cell parameters | Cell volume (Å <sup>3</sup> ) | 296.22                        | 292.92                        |
|                      | <i>a</i> (Å)                  | 10.3975                       | 10.3944                       |
|                      | <i>b</i> (Å)                  | 6.0281                        | 6.0235                        |
|                      | <i>c</i> (Å)                  | 4.7262                        | 4.6782                        |

**Table S6†** The structure parameters of the LiMnPO<sub>4</sub>, MnPO<sub>4</sub>, LiFePO<sub>4</sub>, and FePO<sub>4</sub> samples.

| Samples              |                               | LiMnPO <sub>4</sub>           | LiFePO <sub>4</sub>           | MnPO <sub>4</sub>             | FePO <sub>4</sub>             |
|----------------------|-------------------------------|-------------------------------|-------------------------------|-------------------------------|-------------------------------|
| Space group          |                               | <i>Pnma</i><br>(orthorhombic) | <i>Pnma</i><br>(orthorhombic) | <i>Pnma</i><br>(orthorhombic) | <i>Pnma</i><br>(orthorhombic) |
| Unit cell parameters | Cell volume (Å <sup>3</sup> ) | 310.8783                      | 302.4183                      | 275.8838                      | 290.6502                      |
|                      | <i>a</i> (Å)                  | 10.5751                       | 10.4529                       | 9.7575                        | 10.0089                       |
|                      | <i>b</i> (Å)                  | 6.1570                        | 6.0864                        | 5.8580                        | 5.9326                        |
|                      | <i>c</i> (Å)                  | 4.7746                        | 4.7534                        | 4.8265                        | 4.8647                        |
| M-O parameters       | Average bond length (Å)       | 2.2193                        | 2.1841                        | 2.0327                        | 2.0623                        |
|                      | Distortion index (Å)          | 0.0278                        | 0.0339                        | 0.0626                        | 0.0399                        |

## References

1. S.-L. Yang, R.-G. Ma, M.-J. Hu, L.-J. Xi, Z.-G. Lu and C. Y. Chung, *J Mater Chem*, 2012, **22**, 25402.
2. B. Wang, W. Al Abdulla, D. Wang and X. S. Zhao, *Energ Environ Sci*, 2015, **8**, 869-875.
3. W. Xiang, Y. J. Zhong, J. Y. Ji, Y. Tang, H. Shen, X. D. Guo, B. H. Zhong, S. X. Dou and Z. Y. Zhang, *Physical chemistry chemical physics : PCCP*, 2015, **17**, 18629-18637.
4. F. Wen, H. Shu, Y. Zhang, J. Wan, W. Huang, X. Yang, R. Yu, L. Liu and X. Wang, *Electrochim Acta*, 2016, **214**, 85-93.
5. X. Yan, D. Sun, Y. Wang, Z. Zhang, W. Yan, J. Jiang, F. Ma, J. Liu, Y. Jin and K. Kanamura, *Acs Sustain Chem Eng*, 2017, **5**, 4637-4644.
6. S. Li, X. Meng, Q. Yi, J. A. Alonso, M. T. Fernández-Díaz, C. Sun and Z. L. Wang, *Nano Energy*, 2018, **52**, 510-516.
7. L. L. Peng, X. Zhang, Z. W. Fang, Y. Zhu, Y. J. Xie, J. J. Cha and G. H. Yu, *Chem Mater*, 2017, **29**, 10526-10533.
8. B. Wang, A. M. Liu, W. Al Abdulla, D. L. Wang and X. S. Zhao, *Nanoscale*, 2015, **7**, 8819-8828.
9. L. G. Wang, P. J. Zuo, G. P. Yin, Y. L. Ma, X. Q. Cheng, C. Y. Du and Y. Z. Gao, *J Mater Chem A*, 2015, **3**, 1569-1579.
10. P. J. Zuo, L. G. Wang, W. Zhang, G. P. Yin, Y. L. Ma, C. Y. Du, X. Q. Cheng and Y. Z. Gao, *Nanoscale*, 2015, **7**, 11509-11514.
